# Supplementary material for: Association of Self-Reported Physical Fitness with Pregnancy Related Symptoms the GESTAFIT Project
Source: MDPI journal article supplement (doi:10.3390/ijerph18073345), 2021-03-24
Supplement: s1 [file s1]

**Supplementary Table S1.** Prevalence of self-reported pregnancy symptoms and limitations to activities of daily living at the 16<sup>th</sup> (n = 78) and 34<sup>th</sup> (n = 62) gestational weeks.

| Items                              | Pregnancy symptoms                |       |                  |                                   |       |                  | Limitations*                      |                |             |                  |                                   |                |             |                  |
|------------------------------------|-----------------------------------|-------|------------------|-----------------------------------|-------|------------------|-----------------------------------|----------------|-------------|------------------|-----------------------------------|----------------|-------------|------------------|
|                                    | 16 <sup>th</sup> gestational week |       |                  | 34 <sup>th</sup> gestational week |       |                  | 16 <sup>th</sup> gestational week |                |             |                  | 34 <sup>th</sup> gestational week |                |             |                  |
|                                    | Sometimes                         | Often | Total prevalence | Sometimes                         | Often | Total prevalence | n                                 | Limit a little | Limit a lot | Total prevalence | n                                 | Limit a little | Limit a lot | Total prevalence |
| <b>Tiredness-fatigue</b>           | 38.5%                             | 47.4% | 85.9%            | 33.9%                             | 53.2% | 87.1%            | 78                                | 44.9%          | 23.1%       | 68.0%            | 62                                | 48.4%          | 32.3%       | 80.7%            |
| <b>Nausea</b>                      | 25.6%                             | 28.2% | 53.8%            | 16.1%                             | 1.6%  | 17.7%            | 70                                | 30.0%          | 17.1%       | 47.1%            | 45                                | 13.3%          | 0.0%        | 13.3%            |
| <b>Vomiting</b>                    | 11.5%                             | 12.8% | 24.3%            | 3.2%                              | 1.6%  | 4.8%             | 55                                | 18.2%          | 12.7%       | 30.9%            | 45                                | 6.7%           | 2.2%        | 8.9%             |
| <b>Reflux</b>                      | 17.9%                             | 15.4% | 33.3%            | 30.6%                             | 33.9% | 64.5%            | 65                                | 12.3%          | 6.2%        | 18.5%            | 53                                | 32.1%          | 9.4%        | 41.5%            |
| <b>Constipation</b>                | 29.5%                             | 25.6% | 55.1%            | 21.0%                             | 11.3% | 32.3%            | 67                                | 19.4%          | 7.5%        | 26.9%            | 53                                | 20.8%          | 0.0%        | 20.8%            |
| <b>Hemorrhoids</b>                 | 6.4%                              | 5.1%  | 11.5%            | 9.7%                              | 6.5%  | 16.2%            | 47                                | 8.5%           | 0.0%        | 8.5%             | 45                                | 8.9%           | 0.0%        | 8.9%             |
| <b>Dry mouth</b>                   | 19.2%                             | 16.7% | 35.9%            | 35.5%                             | 4.8%  | 40.3%            | 58                                | 8.6%           | 3.4%        | 12.0%            | 54                                | 11.1%          | 0.0%        | 11.1%            |
| <b>Food cravings</b>               | 41.0%                             | 5.1%  | 46.1%            | 29.0%                             | 1.6%  | 30.6%            | 69                                | 1.9%           | 0.0%        | 1.9%             | 56                                | 3.6%           | 0.0%        | 3.6%             |
| <b>Poor sleep</b>                  | 44.9%                             | 29.5% | 74.4%            | 25.8%                             | 66.1% | 91.9%            | 76                                | 47.4%          | 15.8%       | 63.2%            | 61                                | 44.3%          | 39.3%       | 83.6%            |
| <b>Restless legs</b>               | 15.4%                             | 9.0%  | 24.4%            | 19.4%                             | 21.0% | 40.4%            | 52                                | 9.6%           | 3.8%        | 13.4%            | 50                                | 26.0%          | 12.0%       | 38.0%            |
| <b>Leg cramps</b>                  | 10.3%                             | 0.0%  | 10.3%            | 37.1%                             | 14.5% | 51.6%            | 46                                | 8.7%           | 2.2%        | 10.9%            | 56                                | 32.1%          | 7.1%        | 39.2%            |
| <b>Snoring</b>                     | 17.9%                             | 2.6%  | 20.5%            | 9.7%                              | 6.5%  | 16.2%            | 51                                | 3.9%           | 0.0%        | 3.9%             | 51                                | 7.8%           | 0.0%        | 7.8%             |
| <b>Urinary frequency</b>           | 25.6%                             | 66.7% | 92.3%            | 22.6%                             | 67.7% | 90.3%            | 77                                | 42.9%          | 11.7%       | 54.6%            | 62                                | 41.9%          | 22.6%       | 64.5%            |
| <b>Incontinence/leaking urine</b>  | 12.8%                             | 3.8%  | 16.6%            | 17.7%                             | 12.9% | 30.6%            | 53                                | 5.7%           | 11.3%       | 17.0%            | 48                                | 27.1%          | 6.3%        | 33.4%            |
| <b>Increased vaginal discharge</b> | 37.2%                             | 19.2% | 56.4%            | 37.1%                             | 35.5% | 72.6%            | 70                                | 11.4%          | 1.4%        | 12.8%            | 61                                | 29.5%          | 1.6%        | 31.1%            |
| <b>Thrush</b>                      | 5.1%                              | 3.8%  | 8.9%             | 1.6%                              | 6.5%  | 8.1%             | 41                                | 9.8%           | 7.3%        | 17.1%            | 40                                | 7.5%           | 2.5%        | 10.0%            |
| <b>Changes in libido</b>           | 32.1%                             | 23.1% | 55.2%            | 45.2%                             | 21.0% | 66.2%            | 69                                | 27.5%          | 8.7%        | 36.2%            | 52                                | 26.9%          | 13.5%       | 40.4%            |
| <b>Painful veins in vagina</b>     | 0.0%                              | 2.6%  | 2.6%             | 6.5%                              | 4.8%  | 11.3%            | 35                                | 5.7%           | 0.0%        | 5.7%             | 40                                | 7.5%           | 5.0%        | 12.5%            |
| <b>Carpel tunnel (numb hands)</b>  | 7.7%                              | 5.1%  | 12.8%            | 12.9%                             | 12.9% | 25.8%            | 46                                | 8.7%           | 4.3%        | 13.0%            | 45                                | 24.4%          | 4.4%        | 28.8%            |

|                                                 |       |       |       |       |       |       |    |       |       |       |    |       |       |       |
|-------------------------------------------------|-------|-------|-------|-------|-------|-------|----|-------|-------|-------|----|-------|-------|-------|
| Sciatica/ pain<br>down the back of<br>your legs | 12.8% | 12.8% | 25.6% | 30.6% | 16.1% | 46.7% | 51 | 33.3% | 13.7% | 47.0% | 52 | 30.8% | 19.2% | 50.0% |
| Back pain                                       | 38.5% | 24.4% | 62.9% | 38.7% | 25.8% | 64.5% | 71 | 35.2% | 11.3% | 46.5% | 56 | 33.9% | 25.0% | 58.9% |
| Hip or pelvic<br>pain                           | 23.1% | 6.4%  | 29.5% | 29.0% | 22.6% | 51.6% | 59 | 20.3% | 5.1%  | 25.4% | 53 | 32.1% | 22.6% | 54.7% |
| Breast pain                                     | 29.5% | 41.0% | 70.5% | 16.1% | 12.9% | 29.0% | 71 | 25.4% | 4.2%  | 29.6% | 48 | 16.7% | 0.0%  | 16.7% |
| Headache                                        | 29.5% | 29.5% | 59.0% | 19.4% | 4.8%  | 24.2% | 72 | 31.9% | 20.8% | 52.7% | 49 | 24.5% | 6.1%  | 30.6% |
| Sore nipples                                    | 25.6% | 21.8% | 47.4% | 16.1% | 11.3% | 27.4% | 59 | 20.3% | 3.4%  | 23.7% | 46 | 8.7%  | 0.0%  | 8.7%  |
| Dizziness                                       | 17.9% | 6.4%  | 24.3% | 19.4% | 6.5%  | 25.9% | 57 | 19.3% | 7.0%  | 26.3% | 50 | 18.0% | 10.0% | 28.0% |
| Fainting                                        | 1.3%  | 0.0%  | 1.3%  | 0.0%  | 0.0%  | 0.0%  | 31 | 6.5%  | 0.0%  | 6.5%  | 39 | 0.0%  | 2.6%  | 2.6%  |
| Heart<br>palpitations                           | 24.4% | 5.1%  | 29.5% | 22.6% | 4.8%  | 27.4% | 51 | 11.8% | 2.0%  | 13.8% | 46 | 17.4% | 0.0%  | 17.4% |
| Shortness of<br>breath                          | 12.8% | 5.1%  | 17.9% | 29.0% | 11.3% | 40.3% | 50 | 16.0% | 4.0%  | 20.0% | 50 | 38.0% | 10.0% | 48.0% |
| Taste/smell<br>changes                          | 26.9% | 39.7% | 66.6% | 11.3% | 8.1%  | 19.4% | 73 | 19.2% | 9.6%  | 28.8% | 45 | 8.9%  | 0.0%  | 8.9%  |
| Forgetfulness                                   | 19.2% | 9.0%  | 28.2% | 40.3% | 16.1% | 56.4% | 57 | 17.5% | 5.3%  | 22.8% | 54 | 20.4% | 5.6%  | 26.0% |
| Feeling<br>depressed                            | 25.6% | 2.6%  | 28.2% | 27.4% | 1.6%  | 29.0% | 57 | 15.8% | 1.8%  | 17.6% | 49 | 20.4% | 2.0%  | 22.4% |
| Anxiety                                         | 11.5% | 7.7%  | 19.2% | 16.1% | 4.8%  | 20.9% | 53 | 15.1% | 0.0%  | 15.1% | 48 | 22.9% | 0.0%  | 22.9% |
| Vivid dreams                                    | 23.1% | 11.5% | 34.6% | 35.5% | 8.1%  | 43.6% | 65 | 7.7%  | 0.0%  | 7.7%  | 52 | 11.5% | 1.9%  | 13.4% |
| Altered body<br>image                           | 26.9% | 9.0%  | 35.9% | 35.5% | 8.1%  | 43.6% | 58 | 10.3% | 0.0%  | 10.3% | 52 | 11.5% | 1.9%  | 13.4% |
| Greasy skin/acne                                | 23.1% | 16.7% | 39.8% | 25.8% | 22.6% | 48.4% | 61 | 9.8%  | 1.6%  | 11.4% | 49 | 24.5% | 4.1%  | 28.6% |
| Varicose veins                                  | 3.8%  | 11.5% | 15.3% | 11.3% | 3.2%  | 14.5% | 44 | 9.1%  | 6.8%  | 15.9% | 41 | 4.9%  | 2.4%  | 7.3%  |
| Brownish marks<br>on face                       | 5.1%  | 6.4%  | 11.5% | 22.6% | 14.5% | 37.1% | 0  | 0.0%  | 0.0%  | 0.0%  | 47 | 21.3% | 4.3%  | 25.6% |
| Itchy skin                                      | 26.9% | 28.2% | 55.1% | 11.3% | 17.7% | 29.0% | 67 | 14.9% | 6.0%  | 20.9% | 49 | 14.3% | 0.0%  | 14.3% |
| Changes in<br>nipples                           | 30.8% | 25.6% | 56.4% | 25.8% | 27.4% | 53.2% | 66 | 10.6% | 1.5%  | 12.1% | 54 | 16.7% | 5.6%  | 22.3% |
| Stretch marks                                   | 9.0%  | 2.6%  | 11.6% | 30.6% | 27.4% | 58.0% | 44 | 6.8%  | 0.0%  | 6.8%  | 53 | 15.1% | 0.0%  | 15.1% |

|                              |      |      |       |      |      |       |    |       |      |       |    |      |      |      |
|------------------------------|------|------|-------|------|------|-------|----|-------|------|-------|----|------|------|------|
| <b>Swollen hands or feet</b> | 6.4% | 3.8% | 10.2% | 9.7% | 6.5% | 16.2% | 47 | 14.9% | 2.1% | 17.0% | 41 | 4.9% | 2.4% | 7.3% |
|------------------------------|------|------|-------|------|------|-------|----|-------|------|-------|----|------|------|------|

\*As the number of women responding questions varied, the denominator is displayed for each symptom (n). Women who did not experience any of the symptoms did not answer questions about their limitations.

**Supplementary Table S2.** Partial correlations of self-reported overall PF and its components with pregnancy symptoms and limitations to activities of daily living at the 16<sup>th</sup> and 34<sup>th</sup> gestational weeks.

| Items                    | Pregnancy symptoms                         |               |                |       |       | Limitations*                               |       |               |               |                |                                            |       |       |       |       |                                            |       |               |       |               |
|--------------------------|--------------------------------------------|---------------|----------------|-------|-------|--------------------------------------------|-------|---------------|---------------|----------------|--------------------------------------------|-------|-------|-------|-------|--------------------------------------------|-------|---------------|-------|---------------|
|                          | 16 <sup>th</sup> gestational week (n = 74) |               |                |       |       | 34 <sup>th</sup> gestational week (n = 23) |       |               |               |                | 16 <sup>th</sup> gestational week (n = 59) |       |       |       |       | 34 <sup>th</sup> gestational week (n = 31) |       |               |       |               |
|                          | OPF                                        | CRF           | MS             | S-A   | FLEX  | OPF                                        | CRF   | MS            | S-A           | FLEX           | OPF                                        | CRF   | MS    | S-A   | FLEX  | OPF                                        | CRF   | MS            | S-A   | FLEX          |
| <b>Tiredness-fatigue</b> | <b>-,277*</b>                              | <b>-,279*</b> | <b>-,255*</b>  | -,322 | -,149 | -,349                                      | -,342 | <b>-,307*</b> | -,193         | -,121          | -,074                                      | -,293 | ,113  | -,129 | -,211 | -,188                                      | -,094 | -,148         | -,273 | -,273         |
| <b>Nausea</b>            | -,177                                      | -,182         | <b>-,247*</b>  | -,163 | -,124 | -,478                                      | -,314 | -,204         | <b>-,297*</b> | -,152          | ,024                                       | ,066  | ,177  | ,230  | ,215  | -,197                                      | -,003 | <b>-,369*</b> | -,267 | -,018         |
| <b>Vomiting</b>          | -,012                                      | -,114         | -,057          | -,087 | ,101  | -,274                                      | -,104 | -,218         | -,189         | -,009          | ,033                                       | ,060  | ,168  | ,062  | ,074  | <b>-,390*</b>                              | ,035  | -,228         | -,342 | ,074          |
| <b>Reflux</b>            | ,011                                       | ,038          | ,032           | -,064 | ,051  | -,248                                      | -,164 | -,055         | -,062         | <b>-,376**</b> | ,094                                       | ,007  | ,419  | ,124  | -,009 | -,201                                      | ,147  | -,165         | ,008  | -,256         |
| <b>Constipation</b>      | -,040                                      | -,181         | -,071          | ,096  | -,079 | -,194                                      | -,077 | ,137          | ,051          | ,130           | -,393                                      | -,616 | -,307 | -,339 | -,343 | ,054                                       | ,000  | ,257          | ,184  | ,102          |
| <b>Haemorrhoids</b>      | -,131                                      | -,040         | <b>-,315**</b> | ,022  | ,087  | -,071                                      | -,314 | -,143         | ,012          | ,103           |                                            |       |       |       |       | -,073                                      | -,159 | ,020          | ,075  | ,068          |
| <b>Dry mouth</b>         | -,142                                      | -,141         | -,030          | -,042 | ,054  | -,292                                      | -,236 | -,114         | -,161         | ,183           | -,185                                      | -,577 | -,182 | ,005  | -,203 | <b>-,461*</b>                              | -,344 | <b>-,443*</b> | -,490 | -,220         |
| <b>Food cravings</b>     | ,094                                       | ,065          | ,006           | -,163 | ,038  | ,130                                       | ,077  | <b>,321*</b>  | ,187          | ,037           |                                            |       |       |       |       | -,026                                      | -,096 | ,028          | ,074  | ,064          |
| <b>Poor sleep</b>        | <b>-,408**</b>                             | -,191         | -,202          | -,289 | -,022 | -,253                                      | -,309 | -,072         | -,062         | -,195          | -,244                                      | -,214 | -,033 | -,341 | -,318 | -,035                                      | -,010 | -,147         | -,104 | <b>-,382*</b> |
| <b>Restless legs</b>     | -,173                                      | -,124         | ,026           | ,036  | -,073 | -,074                                      | -,130 | ,012          | -,120         | -,114          | <b>-,489*</b>                              | -,172 | -,125 | -,131 | -,024 | -,020                                      | -,112 | ,011          | ,131  | -,166         |
| <b>Leg cramps</b>        | ,034                                       | -,119         | ,042           | ,128  | -,055 | ,105                                       | ,183  | ,175          | ,140          | ,032           |                                            |       |       |       |       | -,248                                      | ,154  | -,150         | -,276 | -,166         |
| <b>Snoring</b>           | -,056                                      | -,067         | -,032          | ,029  | ,141  | ,082                                       | -,067 | ,045          | -,096         | ,007           | -,005                                      | -,125 | -,206 | ,094  | ,056  | -,040                                      | ,051  | -,249         | -,073 | ,075          |
| <b>Urinary frequency</b> | <b>-,273*</b>                              | -,130         | -,093          | ,157  | -,089 | -,152                                      | ,017  | ,006          | ,068          | -,206          | -,413                                      | -,600 | -,350 | -,417 | -,353 | -,110                                      | ,067  | -,215         | -,146 | <b>-,459*</b> |

|                                                          |               |               |                |       |       |       |       |       |       |               |       |       |       |       |       |                |              |        |       |                |
|----------------------------------------------------------|---------------|---------------|----------------|-------|-------|-------|-------|-------|-------|---------------|-------|-------|-------|-------|-------|----------------|--------------|--------|-------|----------------|
| <b>Incontinence/<br/>leaking urine</b>                   | -,023         | -,129         | ,073           | -,187 | -,126 | -,173 | -,093 | -,001 | ,025  | -,041         | -,075 | ,005  | ,286  | -,386 | -,385 | -,110          | ,053         | -,082  | -,125 | <b>-,378*</b>  |
| <b>Increased<br/>vaginal<br/>discharge</b>               | -,180         | -,035         | -,167          | -,239 | -,211 | -,223 | -,248 | ,021  | -,159 | <b>-,316*</b> | -,104 | -,041 | ,346  | -,283 | -,322 | <b>-,518**</b> | -,173        | -,453* | -,475 | -,345          |
| <b>Thrush</b>                                            | ,006          | -,094         | -,060          | ,176  | ,085  | -,054 | ,130  | ,052  | -,093 | -,238         | -,114 | -,391 | -,273 | ,079  | ,078  | -,193          | -,006        | -,080  | -,318 | <b>-,472**</b> |
| <b>Changes in<br/>libido</b>                             | <b>-,268*</b> | -,201         | -,205          | -,088 | -,017 | -,153 | ,007  | -,156 | -,149 | -,145         | -,149 | -,021 | -,306 | -,039 | -,037 | ,055           | ,086         | -,214  | ,039  | -,057          |
| <b>Painful veins in<br/>vagina</b>                       | -,009         | ,055          | -,018          | -,257 | -,235 | -,009 | ,166  | ,072  | -,164 | -,134         |       |       |       |       |       | ,065           | <b>,407*</b> | ,247   | -,053 | -,285          |
| <b>Carpel tunnel<br/>(numb hands)</b>                    | <b>-,251*</b> | -,133         | <b>-,333**</b> | -,119 | ,032  | -,212 | -,189 | -,103 | -,144 | ,001          | -,131 | ,082  | -,347 | -,088 | ,141  | -,153          | -,193        | -,356  | -,132 | -,048          |
| <b>Sciatica/ pain<br/>down the back<br/>of your legs</b> | -,058         | <b>-,267*</b> | -,218          | -,283 | ,018  | -,136 | -,030 | -,136 | -,162 | -,098         | ,152  | -,312 | ,166  | -,078 | -,180 | -,129          | -,162        | -,111  | -,297 | -,336          |
| <b>Back pain</b>                                         | -,021         | -,143         | ,052           | -,031 | ,011  | -,250 | -,215 | -,164 | -,108 | -,177         | ,121  | -,355 | ,374  | ,203  | ,034  | ,017           | -,239        | -,053  | ,061  | -,291          |
| <b>Hip or pelvic<br/>pain</b>                            | -,187         | -,200         | -,064          | -,243 | ,043  | -,385 | -,261 | -,219 | -,154 | -,118         | ,005  | -,192 | ,020  | -,318 | -,369 | -,214          | -,168        | -,063  | -,046 | <b>-,463*</b>  |
| <b>Breast pain</b>                                       | -,045         | -,064         | ,030           | ,172  | -,134 | -,061 | -,069 | -,018 | -,117 | -,094         | -,011 | -,406 | -,203 | ,266  | ,266  | -,350          | -,005        | -,302  | -,379 | -,283          |
| <b>Headache</b>                                          | -,087         | -,046         | -,103          | ,115  | ,083  | -,303 | -,313 | -,128 | -,229 | -,153         | -,055 | -,086 | -,003 | ,151  | ,217  | -,338          | -,329        | -,104  | -,272 | <b>-,403*</b>  |
| <b>Sore nipples</b>                                      | -,114         | -,166         | <b>-,248*</b>  | ,102  | -,135 | -,117 | -,168 | -,100 | ,017  | ,090          | -,054 | -,450 | ,006  | -,054 | -,132 | -,026          | -,096        | ,028   | ,074  | ,064           |
| <b>Dizziness</b>                                         | -,176         | -,140         | -,022          | ,005  | ,081  | -,229 | -,143 | ,051  | -,093 | ,045          | -,269 | -,122 | -,208 | ,135  | ,284  | -,080          | -,158        | -,094  | -,202 | -,301          |
| <b>Fainting</b>                                          | -,150         | -,092         | <b>-,265*</b>  | -,013 | ,076  | ,028  | -,018 | -,071 | -,006 | -,207         | -,304 | -,137 | -,519 | ,091  | ,203  | ,173           | -,116        | ,180   | ,011  | -,185          |

|                               |               |                |               |       |       |       |       |       |                |       |               |       |       |       |       |       |       |               |       |               |
|-------------------------------|---------------|----------------|---------------|-------|-------|-------|-------|-------|----------------|-------|---------------|-------|-------|-------|-------|-------|-------|---------------|-------|---------------|
| <b>Heart palpitations</b>     | -,111         | -,050          | -,127         | -,151 | ,001  | -,205 | -,012 | -,020 | -,205          | -,099 | -,304         | -,266 | -,130 | -,024 | -,124 | ,033  | ,207  | -,104         | ,070  | -,006         |
| <b>Shortness of breath</b>    | -,088         | -,131          | -,138         | -,178 | -,225 | -,291 | -,250 | -,158 | -,105          | ,102  | -,121         | -,197 | -,268 | ,188  | ,103  | -,068 | -,110 | -,256         | -,093 | -,231         |
| <b>Taste/smell changes</b>    | -,110         | -,128          | -,125         | ,059  | ,080  | -,185 | -,304 | -,079 | -,095          | -,044 | -,238         | -,213 | -,046 | -,221 | -,261 | -,006 | ,002  | -,008         | ,029  | ,012          |
| <b>Forgetfulness</b>          | -,138         | ,097           | -,002         | -,070 | -,010 | -,149 | -,094 | ,010  | -,039          | ,054  | -,287         | -,062 | -,488 | -,208 | -,286 | ,111  | ,356  | -,114         | -,075 | -,012         |
| <b>Feeling depressed</b>      | -,177         | -,039          | <b>-,233*</b> | -,028 | ,088  | -,189 | -,250 | -,243 | -,197          | -,018 | -,338         | -,177 | -,240 | ,030  | ,076  | ,122  | ,103  | -,114         | -,108 | ,087          |
| <b>Anxiety</b>                | -,137         | -,059          | -,138         | -,020 | -,091 | -,348 | -,219 | -,237 | <b>-,399**</b> | -,133 | -,294         | -,253 | ,025  | -,050 | -,164 | -,343 | -,123 | <b>-,422*</b> | -,319 | -,207         |
| <b>Vivid dreams</b>           | <b>,246*</b>  | ,081           | <b>,467**</b> | -,035 | -,028 | -,056 | ,011  | -,076 | -,241          | -,073 | -,032         | -,102 | ,087  | -,327 | -,347 | -,348 | -,091 | -,311         | -,455 | <b>-,370*</b> |
| <b>Altered body image</b>     | ,148          | ,052           | ,192          | ,297  | -,021 | -,059 | ,025  | -,047 | <b>-,264*</b>  | -,082 | ,109          | ,165  | -,271 | ,109  | -,026 | -,348 | -,091 | -,311         | -,455 | <b>-,370*</b> |
| <b>Greasy skin/acne</b>       | -,081         | -,124          | ,080          | ,066  | -,076 | ,016  | -,037 | ,067  | -,166          | -,139 | <b>-,545*</b> | -,415 | -,573 | -,285 | -,285 | ,063  | ,041  | -,250         | -,241 | -,156         |
| <b>Varicose veins</b>         | ,102          | ,070           | -,027         | -,100 | -,009 | ,021  | ,007  | ,232  | ,250           | ,118  |               |       |       |       |       | ,177  | ,121  | ,174          | ,215  | ,018          |
| <b>Brownish marks on face</b> | -,057         | ,067           | ,030          | ,114  | ,128  | ,083  | ,057  | ,084  | ,005           | ,162  |               |       |       |       |       | ,003  | -,053 | -,077         | -,022 | ,330          |
| <b>Itchy skin</b>             | <b>-,298*</b> | <b>-,312**</b> | -,053         | -,064 | -,181 | -,044 | -,058 | ,104  | ,088           | ,195  | -,356         | -,548 | -,052 | -,103 | -,190 | -,105 | -,045 | -,204         | -,065 | ,057          |
| <b>Changes in nipples</b>     | -,011         | -,114          | -,176         | ,172  | ,109  | -,106 | ,027  | -,030 | -,119          | -,032 | -,005         | -,125 | -,206 | ,094  | ,056  | -,028 | ,038  | -,198         | -,124 | -,187         |
| <b>Stretch marks</b>          | -,122         | -,121          | -,138         | ,039  | ,047  | -,313 | -,317 | -,115 | -,204          | -,031 |               |       |       |       |       | -,252 | -,140 | <b>-,368*</b> | -,231 | ,055          |

|                                  |       |       |      |       |      |       |       |      |      |      |      |      |      |       |       |       |      |                |       |       |
|----------------------------------|-------|-------|------|-------|------|-------|-------|------|------|------|------|------|------|-------|-------|-------|------|----------------|-------|-------|
| <b>Swollen hands<br/>or feet</b> | -,055 | -,060 | ,015 | -,053 | ,039 | -,114 | -,037 | ,071 | ,080 | ,056 | ,147 | ,046 | ,317 | -,391 | -,369 | -,299 | ,020 | <b>-,632**</b> | -,287 | -,124 |
|----------------------------------|-------|-------|------|-------|------|-------|-------|------|------|------|------|------|------|-------|-------|-------|------|----------------|-------|-------|

\*Women who did not experience any of the symptoms did not answer questions about their limitations. Blank space indicates no answer in that item.

*Note.* Model adjusted for maternal age and body mass index at the 16<sup>th</sup> or 34<sup>th</sup> gestational weeks.

Abbreviations: OPF, Overall physical fitness; CRF, cardiorespiratory fitness; MS, Muscular strength; S-A, Speed-agility; FLEX, Flexibility.

\* $p < 0.05$ ; \*\* $p < 0.01$ .
